# Supplementary material for: The RNA chaperone activity of the Trypanosoma brucei editosome raises the dynamic of bound pre-mRNAs
Source: PubMed Central journal article supplement (PMC4726059; doi:10.1038/srep19309), 2016-01-19

# **The RNA chaperone activity of the *Trypanosoma brucei* editosome raises the dynamic of bound pre-mRNAs**

W.-Matthias Leeder, Christin Voigt, Michael Brecht & H. Ulrich Göringer

Molecular Genetics, Darmstadt University of Technology, Schnittspahnstraße 10, 64287 Darmstadt, Germany

Correspondence and requests for materials should be addressed to HUG ([goringer@bio.tu-darmstadt.de](mailto:goringer@bio.tu-darmstadt.de)).

## Supplementary Tables /Figures

**Supplementary Table. 1. Nucleotide composition of the *T. brucei* mitochondrial pre-mRNAs used in this study.**

|             | pre-mRNA            |                   |                  |                   |                   |
|-------------|---------------------|-------------------|------------------|-------------------|-------------------|
|             | RPS12 <sub>pe</sub> | ND3 <sub>pe</sub> | A6 <sub>pe</sub> | CYb <sub>me</sub> | COI <sub>ne</sub> |
| length (nt) | 282                 | 322               | 344              | 1080              | 1647              |
| A           | 85                  | 110               | 117              | 327               | 372               |
| U           | 93                  | 100               | 75               | 505               | 788               |
| G           | 75                  | 86                | 132              | 179               | 285               |
| C           | 29                  | 26                | 20               | 69                | 202               |
| R/Y         | 1.3                 | 1.6               | 2.6              | 0.9               | 0.7               |

pe: pan-edited, me: marginally edited, ne: never edited.

**Supplementary Table. 2. Summary of the identified 2D-structural features of the 5 *T. brucei* mitochondrial pre-mRNAs in their free RNA folding states.**

|                        | pre-mRNA            |                   |                  |                   |                   |
|------------------------|---------------------|-------------------|------------------|-------------------|-------------------|
|                        | RPS12 <sub>pe</sub> | ND3 <sub>pe</sub> | A6 <sub>pe</sub> | CYb <sub>me</sub> | COI <sub>ne</sub> |
| longest ds             | 17                  | 10                | 9                | 17                | 15                |
| longest ss             | 9                   | 8                 | 18               | 17                | 13                |
| GU bp                  | 21                  | 15                | 17               | 71                | 107               |
| other non-canonical bp | 1                   | 0                 | 0                | 12                | 29                |
| G-quadruplex           | 0                   | 2                 | 4                | 0                 | 0                 |
| pseudoknots            | 1                   | 0                 | 0                | 0                 | 0                 |
| hairpin loops          | 8                   | 9                 | 7                | 24                | 36                |
| tri/tetra loops        | 3                   | 5                 | 2                | 7                 | 14                |
| internal loops         | 7                   | 6                 | 2                | 25                | 23                |
| <i>symmetric</i>       | 2                   | 2                 | 1                | 8                 | 8                 |
| <i>asymmetric</i>      | 5                   | 4                 | 1                | 17                | 15                |
| external loops         | 1                   | 1                 | 1                | 1                 | 1                 |
| multi-loops            | 2                   | 2                 | 3                | 8                 | 11                |
| bulges                 | 2                   | 4                 | 3                | 12                | 26                |

pe: pan-edited, me: marginally edited, ne: never edited.

**Supplementary Figure 1. Experimental variation of SHAPE-modification experiments.** (A) Representative Pearson plot of SHAPE-reactivity data of an experimental replicate (exp. 1, exp. 2) of the RPS12 transcript. (B) Representative Pearson plot of a biochemical replicate (prep. 1, prep. 2) of the RPS12 pre-mRNA. (C) Summary of Pearson correlation coefficients ( $r$ ) and number of experimental replicates for all *T. brucei* transcripts in their free and editosome-bound (ed.-bound) folding states.

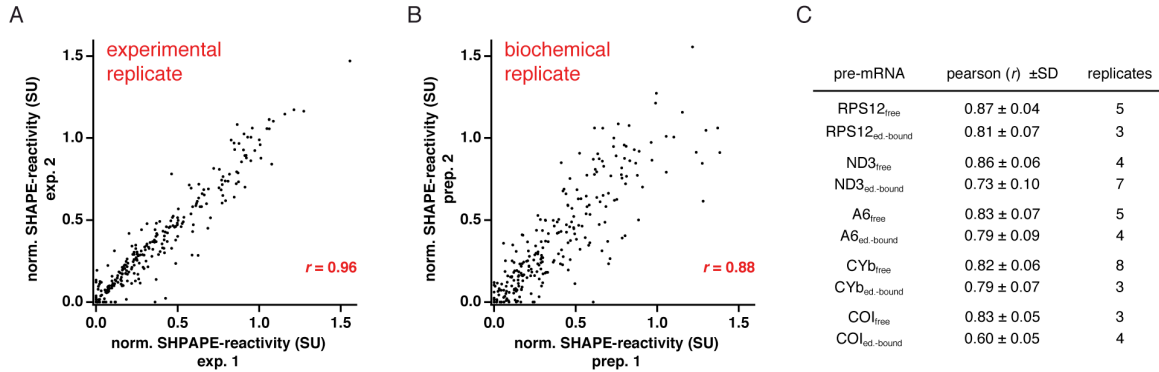

**Supplementary Figure 2. Workflow to generate normalized SHAPE-profiles.** Capillary electrophoresis (CE)-trace of the RPS12 transcript in its free folding state (RPS12<sub>free</sub>) followed by all operational steps to generate normalized SHAPE-modification profiles. RFU: relative fluorescence unit.

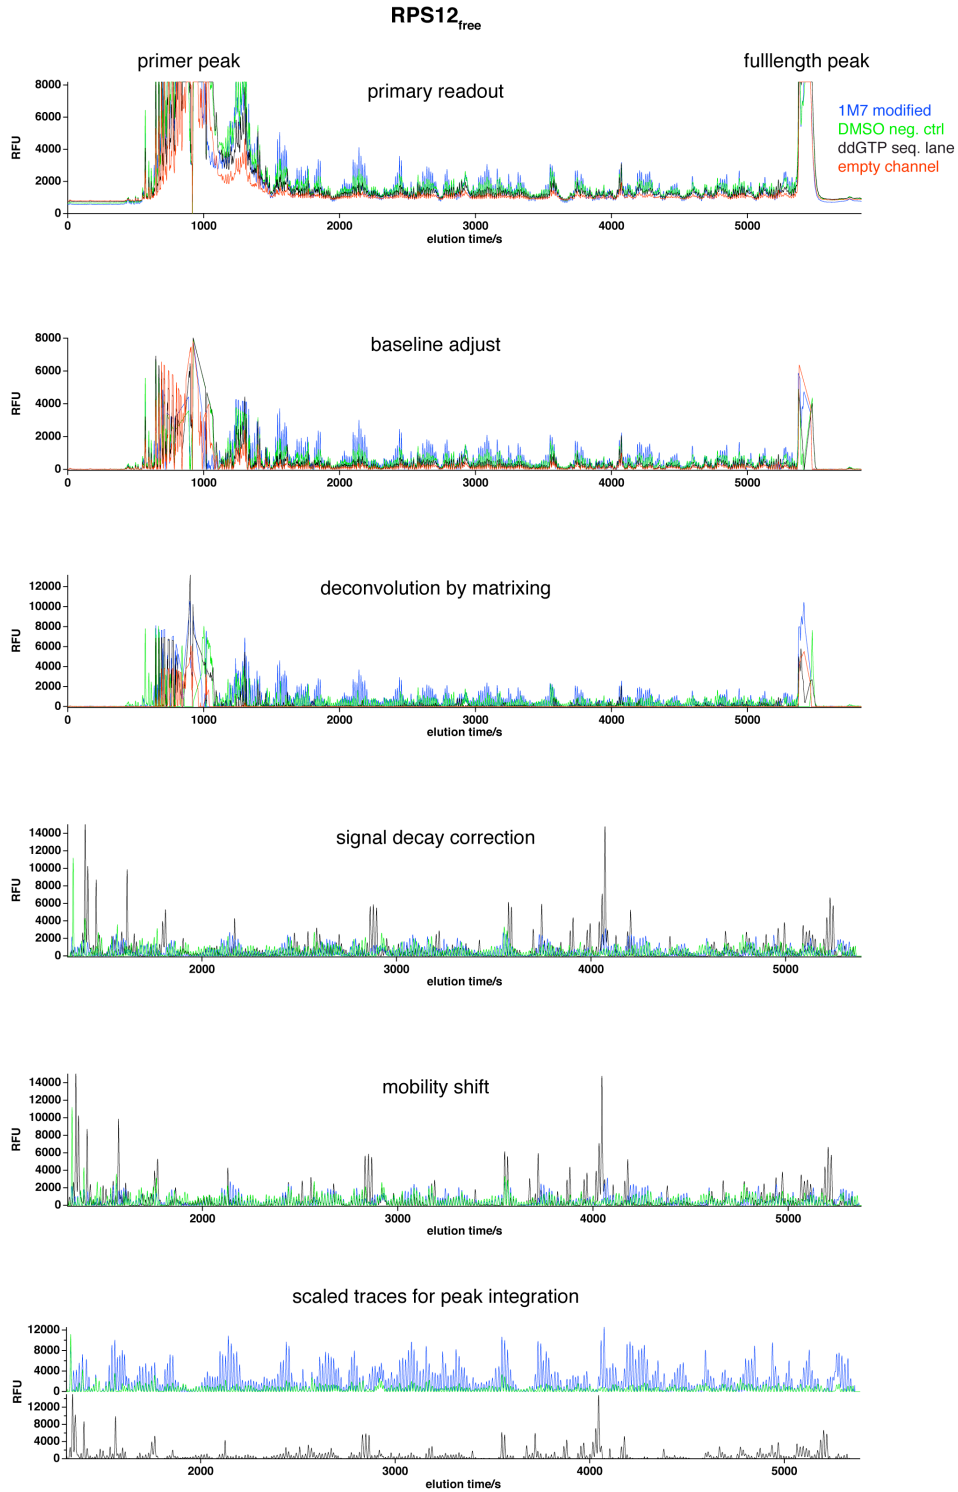

**Supplementary Figure 3. UV-melting curves.** Fraction folded ( $\alpha$ ) versus temperature plots (solid lines) and normalized 1<sup>st</sup>-derivatives (dashed lines) of the never-edited COI-RNA and the pre-edited CYb-, RPS12-, ND3- and A6-transcripts in their free folding states. Colors annotate the percentage of unfolded RNA (see legend). All transcripts show complex melting profiles with a main melting transition around 50°C and additional helix/coil transitions  $\geq 70^\circ\text{C}$  (A6, ND3, RPS12). Bottom table: Comparison of experimentally- and theoretically-derived hyperchromicities ( $A_{\text{rel}}$ ) (see Methods section). Errors are standard deviations (SD).

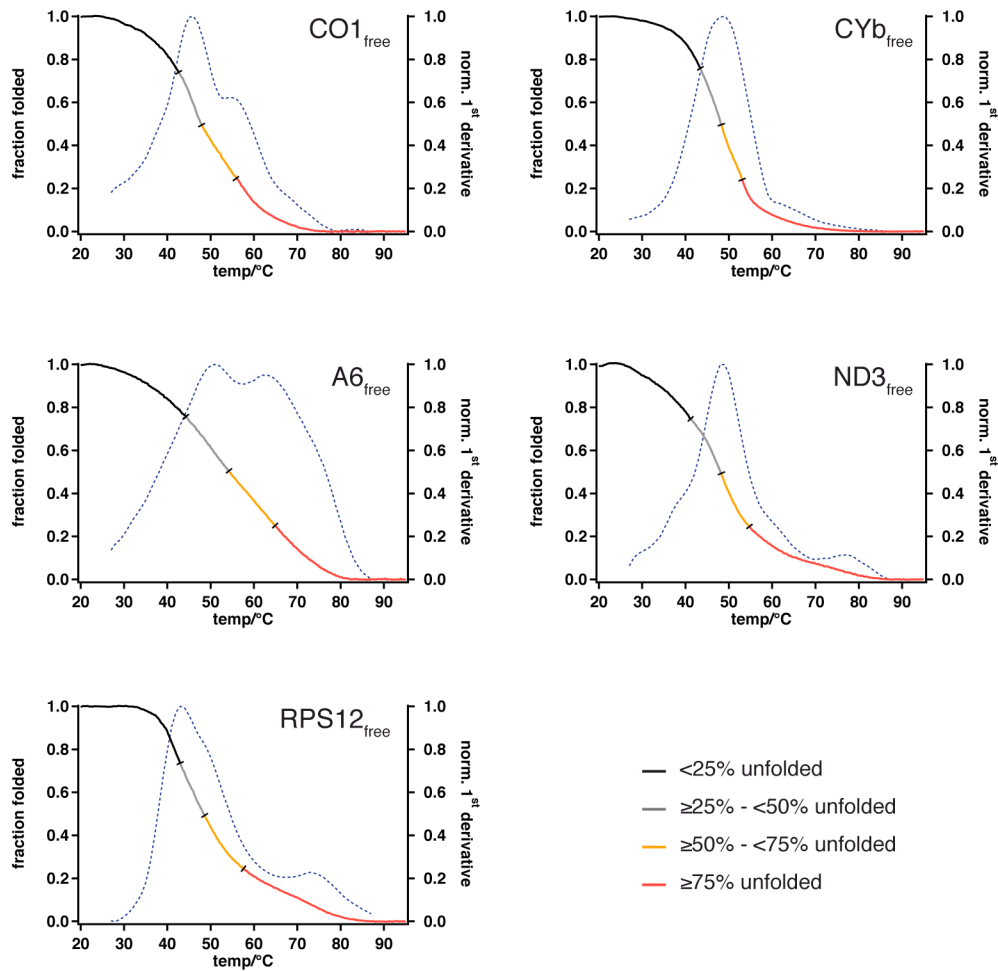

| pre-mRNA              | measured hyperchromicity (%) |  | predicted hyperchromicity (%) |                       |
|-----------------------|------------------------------|--|-------------------------------|-----------------------|
|                       | UV-melting curves            |  | "nearest neighbour"           | "fractional approach" |
| COI <sub>free</sub>   | 20.3±1.0                     |  | 30                            | 22                    |
| Cyb <sub>free</sub>   | 31.5±1.6                     |  | 32                            | 21                    |
| A6 <sub>free</sub>    | 20.3±1.0                     |  | 19                            | 15                    |
| ND3 <sub>free</sub>   | 17.2±0.9                     |  | 20                            | 16                    |
| RPS12 <sub>free</sub> | 20.5±1.2                     |  | 25                            | 20                    |

**Supplementary Figure 4. SHAPE-reactivity profiles of *T. brucei* mitochondrial pre-mRNAs in their editosome-bound folding state.** Normalized SHAPE-reactivity profiles of all 5 transcripts in their editosome-bound folding state (ed.-bound). Black: low ( $\leq 0.35$ SU); yellow: medium ( $0.35 < \text{SU} \leq 0.8$ ); red: high ( $> 0.8$ SU) normalized SHAPE-reactivities. SU: SHAPE-unit. nt: nucleotides.

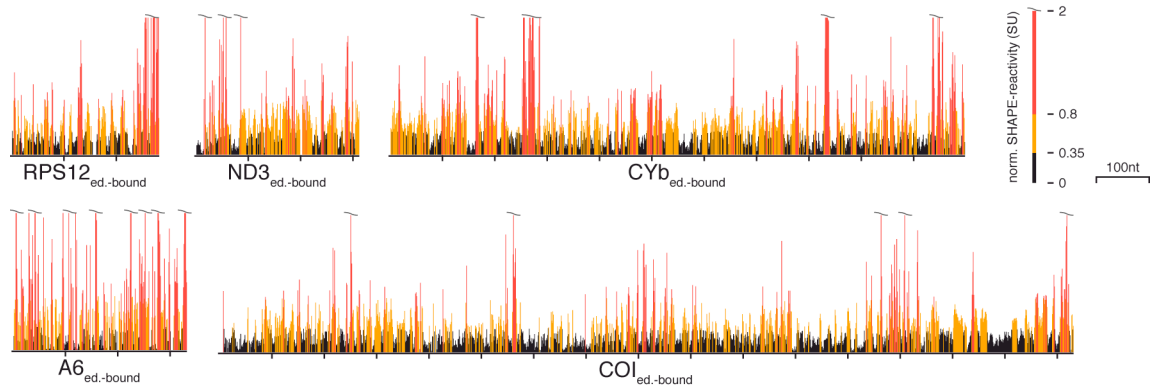

**Supplementary Figure 5. Summary of SHAPE-reactivities in the free and editosome-bound RNA folding state.** Histograms comparing the normalized SHAPE-reactivities of all 5 *T. brucei* mitochondrial transcripts in their free and editosome-bound (ed.-bound) folding state. SHAPE-reactivities were binned in 0.1 SHAPE-units (SU) and plotted as stacked bars in percent. The median SHAPE-reactivity is shown in italics. The arithmetic mean (AM) is marked as a black line. Editosome binding increases the AM of all transcripts especially the 3 pan-edited pre-mRNAs (A6, ND3, RPS12) indicating an increase in structural flexibility.

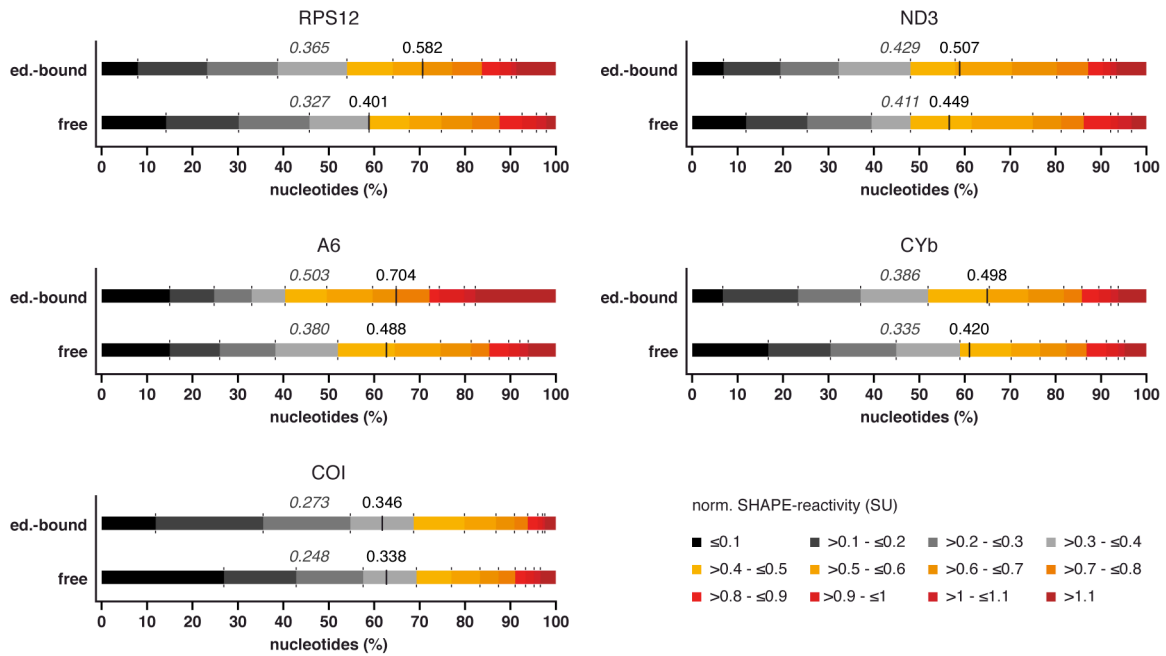



**Supplementary Figure 6. Nucleotide specificity of the free to editosome-bound RNA-folding transition.** For each pre-mRNA transcript, the number of affected nt was set to 100% and divided into 4 classes: nucleotides that become slightly more flexible ( $\Delta\text{SHAPE } 0.2 \leq \text{SU} < 0.35$  - light green), significantly more flexible ( $\Delta\text{SHAPE} \geq 0.35\text{SU}$  - dark green), slightly less flexible ( $\Delta\text{SHAPE } -0.2 \geq \text{SU} > -0.35$  - cyan) and significantly less flexible ( $\Delta\text{SHAPE} \leq -0.35$  - dark blue) in the editosome-bound RNA folding state. A change of 0.35 in either direction can represent the transition from a bp- to a ss-conformation or *vice versa*. Data were plotted as stacked bars in percent. Black lines: relative abundance of the different nucleotides in the various transcripts.

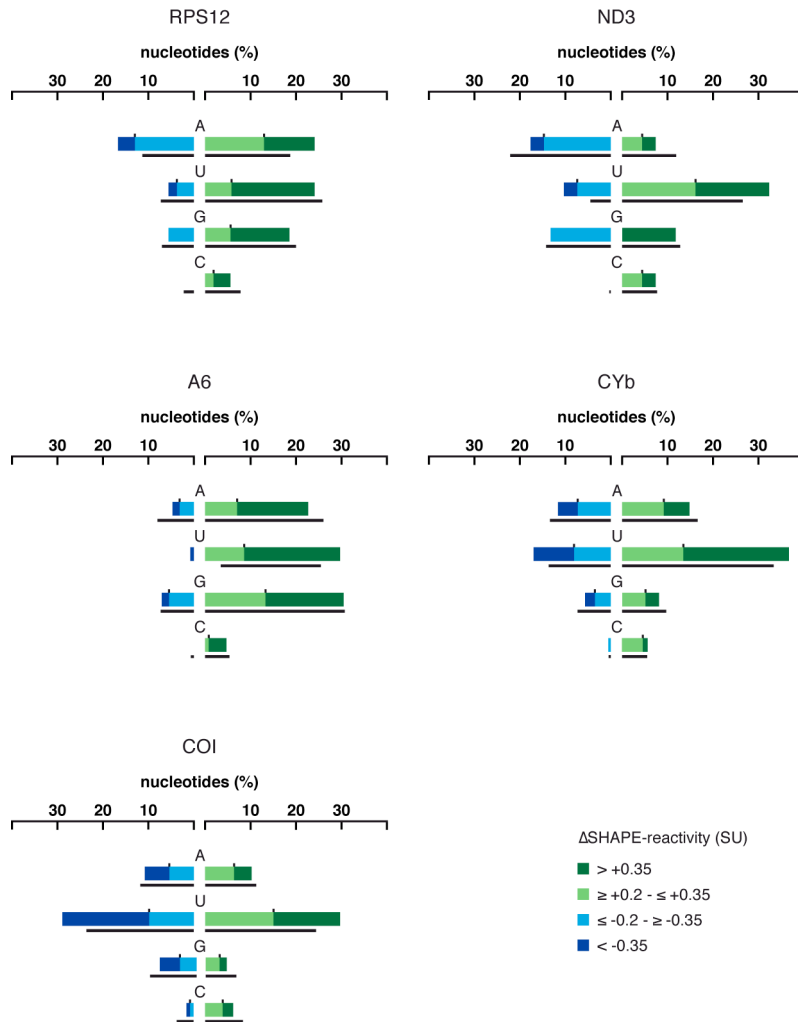

**Supplementary Figure 7. *In vitro* RNA editing.** Pre-cleaved *in vitro* U-insertion (A) and U-deletion (B) RNA editing assays to determine the editing activity of twelve *T. brucei* mitochondrial fractions (F1-12). The U-insertion assay monitors the insertion of 3 U nucleotides; the U-deletion reaction the removal of 4 U's. RNA reactants, intermediates and edited products (annotated to the right of the gels) were electrophoretically separated and densitometrically quantified. \*: position of the radioactive label ( $^{32}\text{P}$ ). Arrows indicate the position of the fully edited mRNA products. Fractions numbered in green were used for the SHAPE-experiments in this study.

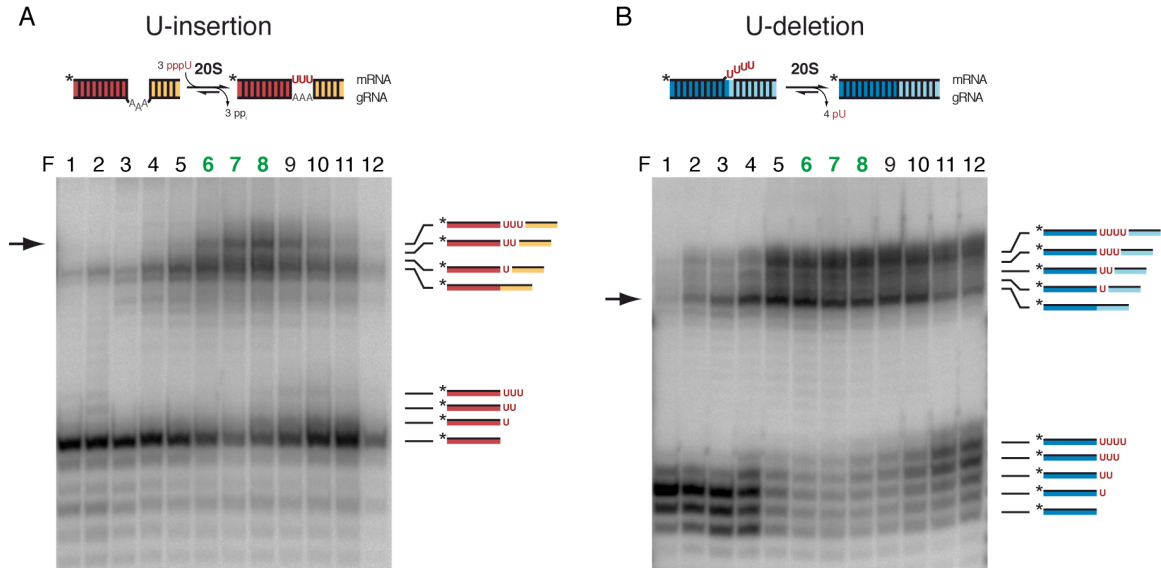

**Supplementary Figure 8. “gDNA”/pre-mRNA-hybrid formation in the free and editosome-bound RNA folding states.** The figure illustrates an example of the RNaseH-experiment and demonstrates all steps to derive quantitative data: (A) initial phosphorimaging output, raw densitometry traces, offset correction, background subtraction/normalization and (B) peak integration.

A

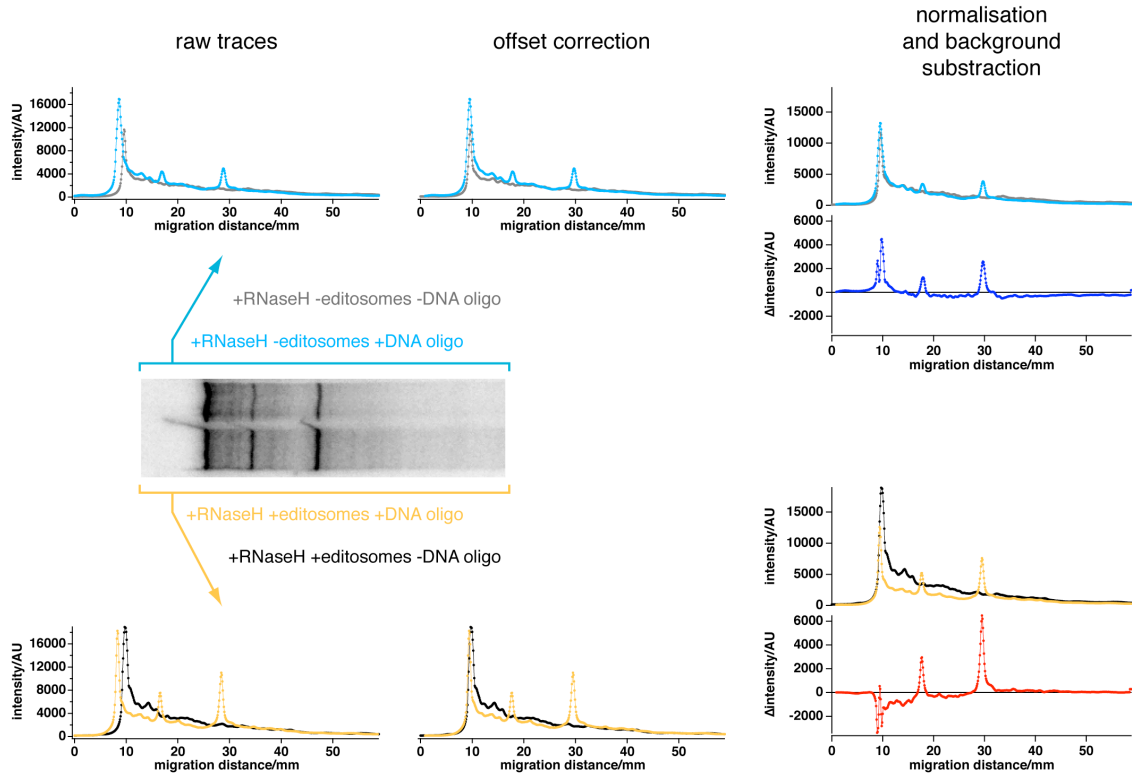

B

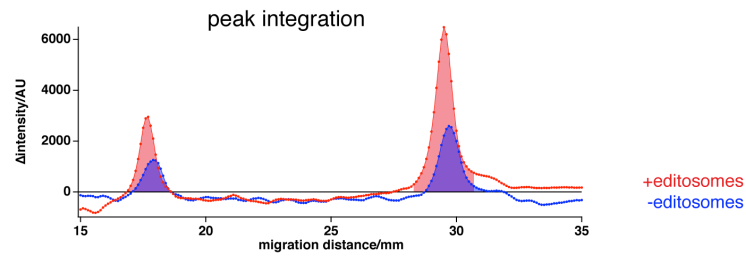

Supplement: srep19309-s1.pdf [file srep19309-s1.pdf]
